# Supplementary material for: Mixed azide–carboxylate bridged tri- and tetranuclear MnII clusters in coordination polymers derived from a zwitterionic dicarboxylate ligand: structures and magnetism
Source: Royal Society of Chemistry journal article supplement (doi:10.1039/c0dt00288g), 2010-01-01
Supplement: c0dt00288g.pdf [file c0dt00288g.pdf]

## Electronic Supplementary Information

### Mixed azide-carboxylate bridged tri- and tetra-nuclear $\text{Mn}^{\text{II}}$ clusters in coordination polymers derived from a zwitterionic dicarboxylate ligand: structures and magnetism

Yu Ma, Kun Wang, En-Qing Gao\* and You Song

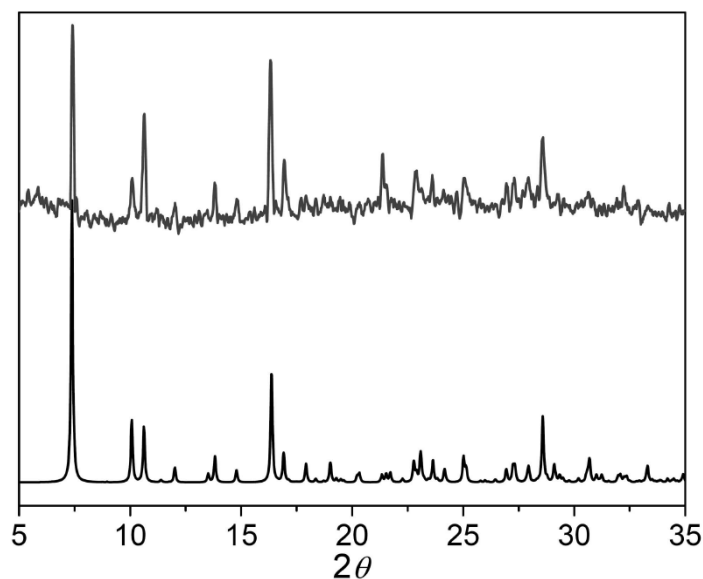

**Fig. S1** Comparison of the PXRD patterns measured for **1** (gray) and that calculated from the single-crystal data of **1** (black)

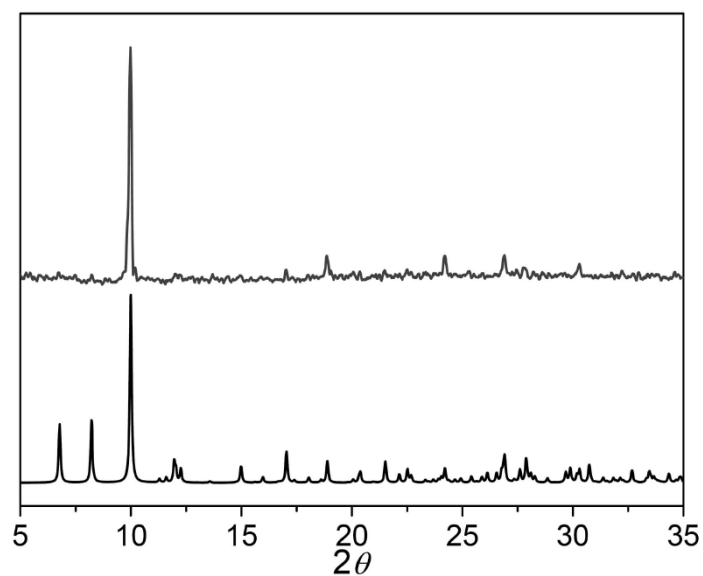

**Fig. S2** Comparison of the PXRD patterns measured for **2** (gray) and that calculated from the single-crystal data of **2** (black)
